# Supplementary material
Source: Royal Society of Chemistry journal article supplement (https://www.rsc.org/suppdata/dt/1999/1365/900173e.doc)
Supplement: Supplementary file 1 [file 900173e.doc]

SUPPLEMENTARY DATA

**[Me2Si] *Ansa* Bridged Complexes of Permethyltitanocene:**

Synthesis and Structural Characterization of Fulvene Derivatives with Trialkylidenemethane Character

Hyosun Lee, Jeffrey B. Bonanno, Tony Hascall, Joseph Cordaro, Juliet M. Hahn and Gerard Parkin*

*Department of Chemistry,*

*Columbia University,*

*New York, New York 10027, USA.*

*Received xxxx xx, 1998.*

__________________________________________________________________

Experimental details, spectroscopic data and crystallographic data.

**Synthesis of [Me2Si(C5Me4)2]TiMe2**

A solution of [Me2Si(C5Me4)2]TiCl2 (0.4 g, 0.96 mmol) in Et2O (10 mL) was treated with MeLi (2 mL of 1.4 M in Et2O; 2.8 mmol) at room temperature. The mixture was stirred at room temperature for *ca*. 18 hours, after which the volatile components were removed *in vacuo*. The residue was extracted with pentane (*ca*. 200 mL), concentrated (to *ca*. 10 mL), and placed at -78˚C. The orange crystals were isolated by filtration and dried *in vacuo*, giving [Me2Si(C5Me4)2]TiMe2 (0.2 g, 55 %). Analysis calculated for C22H36SiTi: C, 70.2 %; H, 9.6 %. Found: C, 69.4 %; H, 9.9 %. IR Data (KBr pellet, cm-1): 2942 (m), 2910 (m), 2876 (m), 1439 (w), 1420 (w), 1409 (w), 1381 (s), 1329 (s), 1260 (s), 1253 (s), 1132 (w), 1019 (m), 842 (vs), 813 (vs), 768 (m), 761 (m), 676 (vs), 660 (s), 628 (w), 541 (w), 479 (vs).

**NMR Data**

**Compound/Assignment  (ppm) Coupling (Hz)**

**1H NMR (C6D6)**

[Me2Si(C5Me4)2]

(CH3)2Si{C5(CH3)4}2

2 (CH3) 0.49 s

(CH3)2Si{C5(CH3)4}2

4 (CH3) 2.12 s

4 (CH3) 1.56 s

Ti-(CH3)2 -0.46 s

**13C NMR (C6D6, 80˚C)**

[Me2Si(C5Me4)2]

(CH3)2Si{C5(CH3)4}2

2 (CH3) 3.4 q, 1JC-H = 121

(CH3)2Si{C5(CH3)4}2

2 C 92.2 s

4 C 124.4 s

4 C 132.2 s

(CH3)2Si{C5(CH3)4}2

4 (CH3) 12.7 q, 1JC-H = 126

4 (CH3) 15.1 q, 1JC-H = 126

Ti-(CH3)2 48.8 q, 1JC-H = 121

**Synthesis of [Me2Si(C5Me4)2]TiPh2**

A solution of [Me2Si(C5Me4)2]TiCl2 (0.30 g, 0.72 mmol) in Et2O (10 mL) was treated with C6H5Li (0.80 mL of 1.8 M in cyclohexane‑ether; 1.44 mmol) and stirred at room temperature for *ca*. 10 minutes. After this period the volatile components were removed under reduced pressure and the residue was extracted into pentane (ca. 100 mL). The pentane extract was concentrated to *ca*. 15 mL and placed at –78˚C, giving [Me2Si(C5Me4)2]TiPh2 as a yellow crystalline material which was isolated by filtration and dried *in vacuo* (0.16 g, 45 %). Analysis calculated for C32H40SiTi: C, 76.8 %; H, 8.1 %. Found: C, 76.7 %; H, 8.1 %. IR Data (KBr pellet, cm-1): 3050 (s), 3032 (s), 2989 (s), 2957 (s), 2899 (vs), 1563 (m), 1473 (s), 1446 (s), 1411 (s), 1378 (s), 1328 (s), 1256 (s), 1189 (w), 1119(s), 1050 (m), 1015 (s), 908 (w), 840 (vs), 814 (vs), 767 (s), 724 (vs), 705 (vs), 676 (vs), 570 (w), 485 (s), 460 (w).

**NMR Data**

**Compound/Assignment  (ppm) Coupling (Hz)**

**1H NMR (C6D6)**

[Me2Si(C5Me4)2]

(CH3)2Si{C5(CH3)4}2

2 (CH3) 0.58 s

(CH3)2Si{C5(CH3)4}2

4 (CH3) 1.78 s

4 (CH3) 1.58 s

Ti-(C6H5)2

2 H 6.62 d, 3JH-H = 8

2 H 7.41 d, 3JH-H = 8

4 H 7.10 m

2 H 6.99 t, 3JH-H = 8

**1H NMR (CDCl3)**

[Me2Si(C5Me4)2]

(CH3)2Si{C5(CH3)4}2

2 (CH3) 0.84 s

(CH3)2Si{C5(CH3)4}2

4 (CH3) 1.93 s

4 (CH3) 1.54 s

Ti-(C6H5)2

2 H 6.53 d, 3JH-H = 7

2 H 6.83 m

2 H 6.91 m

2 H 6.94 m

2 H 7.07 d, 3JH-H = 8

**13C NMR (CDCl3)**

[Me2Si(C5Me4)2]

(CH3)2Si{C5(CH3)4}2

2 (CH3) 2.9 q, 1JC-H = 120

(CH3)2Si{C5(CH3)4}2

2 C 91.8 s

4 C 127.9 s

4 C 136.9 s

(CH3)2Si{C5(CH3)4}2

4 (CH3) 13.3 q, 1JC-H = 127

4 (CH3) 15.6 q, 1JC-H = 127

Ti-(C6H5)2

2 C (ipso) 199.6 s

2 C 123.2 d, 1JC-H = 151

2 C 125.1 d, 1JC-H = 148

2 C 125.4 d, 1JC-H = 158

2 C 133.5 d, 1JC-H = 153

2 C 137.8 d, 1JC-H = 155

**Synthesis of [Me2Si(C5Me4)2]Ti[(C6H4)2]**

A solution of [Me2Si(C5Me4)2]ZrCl2 (0.325 g, 0.78 mmol) in Et2O (15 mL) was treated with C6H5Li (1.51 mL of 1.8 M in cyclohexane‑ether; 2.7 mmol) and stirred at room temperature for *ca*. 16 hours. After this period the volatile components were removed under reduced pressure and the residue was extracted into toluene (*ca*. 100 mL). The toluene extract was dried and washed with pentane (3 10 mL), giving [Me2Si(C5Me4)2]Ti[(C6H4)2] as a brown crystalline material which was dried *in vacuo* (0.095 g, 24 %). IR Data (KBr pellet, cm-1): 3049(s), 2963 (vs), 2909 (vs), 1638 (m), 1570 (m), 1482 (s), 1440 (s), 1413 (s), 1320 (m), 1261 (vs), 1232 (m), 1099 (vs), 1020 (vs), 929 (w), 839 (vs), 812 (vs), 770 (vs), 734 (vs), 670 (s), 678 (s), 570 (m), 504 (s), 471 (s).

**NMR Data**

**Compound/Assignment  (ppm) Coupling (Hz)**

**1H NMR (CDCl3)**

[Me2Si(C5Me4)2]

(CH3)2Si{C5(CH3)4}2

2 (CH3) 0.90 s

(CH3)2Si{C5(CH3)4}2

4 (CH3) 1.80 s

4 (CH3) 1.48 s

Ti-(C6H4)2

2 H 7.52 d, 3JH-H = 8

2 H 5.89 d, 3JH-H = 7

2 H 6.88 t, 3JH-H = 8

2 H 6.72 t, 3JH-H = 7

**1H NMR (C6D6)**

[Me2Si(C5Me4)2]

(CH3)2Si{C5(CH3)4}2

2 (CH3) 0.64 s

(CH3)2Si{C5(CH3)4}2

4 (CH3) 1.62 s

4 (CH3) 1.57 s

Ti-(C6H4)2

2 H 5.97 d, 3JH-H = 7

2 H 6.92 t, 3JH-H = 7

2 H 7.05 t, 3JH-H = 8

2 H 7.74 d, 3JH-H = 8

**13C NMR (CDCl3)**

[Me2Si(C5Me4)2]

(CH3)2Si{C5(CH3)4}2

2 (CH3) 3.3 q, 1JC-H = 120

(CH3)2Si{C5(CH3)4}2

2 C 89.6 s

4 C 128.0 s

4 C 142.6 s

(CH3)2Si{C5(CH3)4}2

4 (CH3) 12.5 q, 1JC-H = 127

4 (CH3) 14.9 q, 1JC-H = 127

Ti-(C6H4)2

2 C (ipso) 205.9 s

2 C (bridged C) 136.7 s

2 C 120.4 d, 1JC-H = 152

2 C 124.3 d, 1JC-H = 157

2 C 124.9 d, 1JC-H = 156

2 C 131.6 d, 1JC-H = 152

**Synthesis of [Me2Si(C5Me4)2]Ti(CH2SiMe3)2**

A solution of [Me2Si(C5Me4)2]TiCl2 (0.30 g, 0.72 mmol) in Et2O (15 mL) was treated with LiCH2SiMe3 (1.8 mL of 1.0 M in pentane; 1.8 mmol) and stirred at room temperature for *ca*. 2.5 hours. After this period the volatile components were removed under reduced pressure and the residue was extracted into pentane (*ca*. 100 mL). The pentane extract was concentrated to *ca*. 15 mL and placed at –78˚C, giving [Me2Si(C5Me4)2]Ti(CH2SiMe3)2 as a yellow crystalline material which was isolated by filtration and dried in vacuo (0.27 g, 71 %). Analysis calculated for C28H52Si3Ti: C, 64.6 %; H, 10.1 %. Found: C, 64.7 %; H, 10.2 %. IR Data (KBr pellet, cm-1): 2948 (s), 2899 (s), 1477 (w), 1441 (w), 1381 (m), 1333 (m), 1241 (s), 1131 (m), 1018 (m), 923 (m), 904 (m), 843 (vs), 722 (s), 676 (s), 536 (w), 461 (w).

**NMR Data**

**Compound/Assignment  (ppm) Coupling (Hz)**

**1H NMR (C6D6)**

[Me2Si(C5Me4)2]

(CH3)2Si{C5(CH3)4}2

2 (CH3) 0.47 s

(CH3)2Si{C5(CH3)4}2

4 (CH3) 2.12 s

4 (CH3) 1.68 s

Ti-{CH2Si(CH3)3}2

4 H 0.01 s

Ti-{CH2Si(CH3)3}2

18 H 0.18 s

**13C NMR (C6D6)**

[Me2Si(C5Me4)2]

(CH3)2Si{C5(CH3)4}2

2 (CH3) 3.0 q, 1JC-H = 120

(CH3)2Si{C5(CH3)4}2

2 C 93.3 s

4 C 122.7 s

4 C 133.2 s

(CH3)2Si{C5(CH3)4}2

4 (CH3) 14.0 q, 1JC-H = 126

4 (CH3) 15.4 q, 1JC-H = 126

Ti-{CH2Si(CH3)3}2

2 C 63.8 t, 1JC-H = 106

Ti-{CH2Si(CH3)3}2

6 (CH3) 4.7 q, 1JC-H = 118

**Synthesis of [Me2Si(C5Me4)2]Ti(C6H4C2H4)**

A solution of {[Me2Si(C5Me4)2]TiPh2 (*ca*. 20 mg) in benzene (*ca*. 0.8 mL) was treated with C2H4 (1 atmosphere) and heated at 60˚C for 3 hours. The quantitative formation of dark orange [Me2Si(C5Me4)2]Ti(C6H4)(C2H4) was demonstrated by 1H NMR spectroscopy. IR Data (KBr pellet, cm-1): 3040 (m), 2907 (vs), 1477 (m), 1444 (s), 1378 (s), 1328 (s), 1253 (s), 1129 (m), 1017 (s), 921 (w), 838 (vs), 812 (vs), 772 (vs), 733 (vs), 677 (vs), 570 (w), 477 (s).

**NMR Data**

**Compound/Assignment  (ppm) Coupling (Hz)**

**1H NMR (CDCl3)**

[Me2Si(C5Me4)2]

(CH3)2Si{C5(CH3)4}

1 (CH3) 0.79 s

1 (CH3) 0.76 s

(CH3)2Si{C5(CH3)4}2

2 (CH3) 2.30 s

2 (CH3) 1.78 s

2 (CH3) 1.57 s

2 (CH3) 1.56 s

Ti-{CH2CH2(C6H4)}

2 H 0.74 t, 3JH-H = 7

Ti-{CH2CH2(C6H4)}

2 H 2.73 t, 3JH-H = 7

Ti-{CH2CH2(C6H4)}

1 H 5.92 d, 3JH-H = 7

1 H 6.57 d, 3JH-H = 7

1 H 6.65 t, 3JH-H = 7

1 H 6.70 m

**1H NMR (C6D6)**

[Me2Si(C5Me4)2]

(CH3)2Si{C5(CH3)4}

1 (CH3) 0.58 s

1 (CH3) 0.53 s

(CH3)2Si{C5(CH3)4}2

2 (CH3) 2.20 s

2 (CH3) 1.67 s

2 (CH3) 1.65 s

2 (CH3) 1.39 s

Ti-{CH2CH2(C6H4)}

2 H 0.93 t, 3JH-H = 7

Ti-{CH2CH2(C6H4)}

2 H 3.05 t, 3JH-H = 7

Ti-{CH2CH2(C6H4)}

1 H 6.06 d, 3JH-H = 7

3 H 6.85 – 7.00 m

**13C NMR (CDCl3)**

[Me2Si(C5Me4)2]

(CH3)2Si{C5(CH3)4}2

1 (CH3) 3.2 q, 1JC-H = 120

1 (CH3) 3.3 q, 1JC-H = 120

(CH3)2Si{C5(CH3)4}2

2 C 92.0 s

2 C 125.4 s

2 C 126.9 s

2 C 135.0 s

2 C 135.2 s

(CH3)2Si{C5(CH3)4}2

2 (CH3) 12.4 q, 1JC-H = 127

2 (CH3) 13.1 q, 1JC-H = 127

2 (CH3) 14.8 q, 1JC-H = 127

2 (CH3) 14.9 q, 1JC-H = 127

Ti-{CH2CH2(C6H4)}

1 C 35.7 t, 1JC-H = 124

Ti-{CH2CH2(C6H4)}

1 C 59.4 t, 1JC-H = 124

Ti-{CH2CH2(C6H4)}

1 C (ipso) 200.7 s

1 C 123.3 d, 1JC-H = 156

1 C 123.8 d, 1JC-H = 157

1 C 125.5 d, 1JC-H = 159

1 C 132.0 d, 1JC-H = 152

1 C 145.9 s

**Synthesis of [Me2Si(C5Me4)2]Ti(C6H4C2H2)**

A solution of {[Me2Si(C5Me4)2]TiPh2 (*ca*. 20 mg) in benzene (*ca*. 0.8 mL) was treated with C2H2 (1 atmosphere) and heated at 60˚C for 12 hours. The quantitative formation of dark red brown [Me2Si(C5Me4)2]Ti(C6H4C2H2) was demonstrated by 1H NMR spectroscopy. Analysis calculated for C28H36SiTi: C, 75.0 %; H, 8.1 %. Found: C, 75.6 %; H, 8.6 %. IR Data (KBr pellet, cm-1): 3036 (m), 2910 (vs), 2722 (m), 2373 (m), 1928 (w), 1563 (m), 1478 (s), 1438 (s), 1379 (vs), 1321 (s), 1254 (s), 1191 (w), 1128 (m), 1017 (s), 926 (w), 840 (vs), 812 (vs), 776 (vs), 725 (vs), 676 (vs), 636 (m), 499 (vs), 474 (m).

**NMR Data**

**Compound/Assignment  (ppm) Coupling (Hz)**

**1H NMR (C6D6)**

[Me2Si(C5Me4)2]

(CH3)2Si{C5(CH3)4}

1 (CH3) 0.62 s

1 (CH3) 0.58 s

(CH3)2Si{C5(CH3)4}2

2 (CH3) 2.05 s

4 (CH3) 1.63 s

2 (CH3) 1.44 s

Ti-{CHCH(C6H4)}

1 H 6.41 d, 3JH-H = 12

Ti-{CHCH(C6H4)}

1 H 6.71 d, 3JH-H = 12

Ti-{CHCH(C6H4)}

1 H 6.06 d, 3JH-H = 7

3 H 6.85 – 7.05 m

**1H NMR (CDCl3)**

[Me2Si(C5Me4)2]

(CH3)2Si{C5(CH3)4}

1 (CH3) 0.86 s

1 (CH3) 0.82 s

(CH3)2Si{C5(CH3)4}2

2 (CH3) 2.02 s

2 (CH3) 1.77 s

2 (CH3) 1.62 s

2 (CH3) 1.51 s

Ti-{CHCH(C6H4)}

2 H 6.34 AB quartet

Ti-{CHCH(C6H4)}

1 H 5.94 d, 3JH-H = 7

1 H 6.57 d, 3JH-H = 7

1 H 6.61 t, 3JH-H = 7

1 H 6.77 t, 3JH-H = 7

**13C NMR (CDCl3)**

[Me2Si(C5Me4)2]

(CH3)2Si{C5(CH3)4}2

2 (CH3) 3.4 q, 1JC-H = 120

(CH3)2Si{C5(CH3)4}2

2 C 88.8 s

2 C 126.1 s

2 C 126.9 s

2 C 134.1 s

2 C 134.8 s

(CH3)2Si{C5(CH3)4}2

2 (CH3) 12.5 q, 1JC-H = 127

2 (CH3) 13.6 q, 1JC-H = 127

2 (CH3) 14.5 q, 1JC-H = 126

2 (CH3) 14.9 q, 1JC-H = 126

Ti-{CHCH(C6H4)}

1 C 208.8 d, 1JC-H = 139

Ti-{CHCH(C6H4)}

1 C 128.2 d, 1JC-H = 149

Ti-{CHCH(C6H4)}

1 C (ipso) 142.7 s

1 C 123.1 d, 1JC-H = 156

1 C 123.2 d, 1JC-H = 154

1 C 123.9 d, 1JC-H = 158

1 C 131.6 d, 1JC-H = 152

1 C 128.3 s

**Synthesis of [Me2Si(C5Me4)(C5Me3CH2)]Ti(C6H5)**

A solution of {[Me2Si(C5Me4)2]TiPh2 (*ca*. 20 mg) in benzene (*ca*. 0.8 mL) was heated at 60˚C for 5 hours. The quantitative formation of dark green [Me2Si(C5Me4)(C5Me3CH2)]Ti(C6H5) was demonstrated by 1H NMR spectroscopy. Analysis calculated for C26H34SiTi: C, 73.9 %; H, 8.1 %. Found: C, 73.7 %; H, 8.4 %.IR Data (KBr pellet, cm-1): 3038 (s), 2952 (s), 2908 (vs), 2726 (w), 2368(m), 2341 (w), 1564 (m), 1446 (s), 1413 (s), 1377 (s), 1326 (m), 1300 (m), 1253 (s), 1131 (m), 1054 (m), 1017 (s), 838 (vs), 813 (vs), 769 (vs), 723 (vs), 705 (vs), 670 (vs), 595 (m), 533 (w), 486 (m), 409 (w).

**NMR Data**

**Compound/Assignment  (ppm) Coupling (Hz)**

**1H NMR (C6D6)**

[Me2Si(C5Me4)(C5Me3CH2)]

(CH3)2Si{C10(CH3)7(CH2)}

1 (CH3) 0.36 s

1 (CH3) 0.15 s

(CH3)2Si{C10(CH3)7(CH2)}

1 (CH3) 2.20 s

1 (CH3) 1.76 s

1 (CH3) 1.71 s

1 (CH3) 1.67 s

1 (CH3) 1.66 s

1 (CH3) 1.64 s

1 (CH3) 1.38 s

(CH3)2Si{C10(CH3)7(CH2)}

1 H 1.72 d, 2JH-H = 5

1 H 2.46 d, 2JH-H = 5

Ti-(C6H5)

1 H 5.74 d, 3JH-H = 6

1 H 6.19 d, 3JH-H = 7

3 H 7.00 m

**1H NMR (CDCl3)**

[Me2Si(C5Me4)(C5Me3CH2)]

(CH3)2Si{C10(CH3)7(CH2)}

1 (CH3) 0.51 s

1 (CH3) 0.21 s

(CH3)2Si{C10(CH3)7(CH2)}

1 (CH3) 2.26 s

1 (CH3) 1.89 s

1 (CH3) 1.82 s

1 (CH3) 1.81 s

1 (CH3) 1.79 s

1 (CH3) 1.67 s

1 (CH3) 1.26 s

(CH3)2Si{C10(CH3)7(CH2)}

1 H 1.60 d, 2JH-H = 4

1 H 2.35 d, 2JH-H = 4

Ti-(C6H5)

1 H 5.66 d, 3JH-H = 6

1 H 6.13 br s, not resolved

3 H 6.82 s, not resolved

**13C NMR (CDCl3)**

[Me2Si(C5Me4)(C5Me3CH2)]

(CH3)2Si{C10(CH3)7(CH2)}

1 (CH3) 1.0 q, 1JC-H = 120

1 (CH3) 3.3 q, 1JC-H = 120

(CH3)2Si{C10(CH3)7(CH2)}

1 C 91.0 s

1 C 100.0 s

1 C 116.3 s

1 C 126.6 s

1 C 127.5 s

1 C 128.5 s

1 C 131.9 s

1 C 133.8 s

1 C 135.7 s

1 C 142.6 s

(CH3)2Si{C10(CH3)7(CH2)}

1 (CH3) 12.6 q, 1JC-H = 128

1 (CH3) 12.7 q, 1JC-H = 127

1 (CH3) 12.8 q, 1JC-H = 127

1 (CH3) 13.4 q, 1JC-H = 127

1 (CH3) 13.6 q, 1JC-H = 127

1 (CH3) 14.1 q, 1JC-H = 127

1 (CH3) 16.6 q, 1JC-H = 127

(CH3)2Si{C10(CH3)7(CH2)}

1 C 82.5 dd, 1JC-H = 150, 153

Ti-(C6H5)

1 C (ipso) 192.6 s

1 C 123.7 d, 1JC-H = 158

1 C 124.3 d, 1JC-H = 155

1 C 124.6 d, 1JC-H = 154

1 C 127.4 d, 1JC-H = 152

1 C 131.6 d, 1JC-H = 150

**Synthesis of [Me2Si(C5Me4)(C5Me3CH2)]TiCH2SiMe3**

A solution of [Me2Si(C5Me4)2]Ti(CH2SiMe3)2 (*ca*. 20 mg) in benzene (*ca*. 0.8 mL) was heated at 60˚C for 7 hours. The quantitative formation of blue-green [Me2Si(C5Me4)(C5Me3CH2)]TiCH2SiMe3 was demostrated by 1H NMR spectroscopy. Analysis calculated for C24H40Si2Ti: C, 66.6 %; H, 9.3 %. Found: C, 66.7 %; H, 9.7 %. IR Data (KBr pellet, cm-1): 2958 (vs), 2913 (s), 2368 (w), 2344 (w), 1442 (m), 1378 (m), 1334 (m), 1248 (s), 1134 (m), 1086 (m), 1025 (m), 860 (s), 834 (s), 772 (vs), 715 (s), 669 (m), 576 (w), 452 (w).

**NMR Data**

**Compound/Assignment  (ppm) Coupling (Hz)**

**1H NMR (C6D6)**

[Me2Si(C5Me4)(C5Me3CH2)]

(CH3)2Si{C10(CH3)7(CH2)}

1 (CH3) 0.32 s

1 (CH3) 0.08 s

(CH3)2Si{C10(CH3)7(CH2)}

1 (CH3) 2.21 s

1 (CH3) 2.14 s

1 (CH3) 2.13 s

1 (CH3) 2.12 s

1 (CH3) 2.02 s

1 (CH3) 1.70 s

1 (CH3) 1.64 s

(CH3)2Si{C10(CH3)7(CH2)}

1 H 1.47 d, 2JH-H = 4

1 H 2.51 d, 2JH-H = 4

Ti-{CH2Si(CH3)3}

1 H –1.24 d, 2JH-H = 10

1 H 0.16 d, 2JH-H = 10

Ti-{CH2Si(CH3)3}

9 H 0.05 s

**13C NMR (C6D6)**

[Me2Si(C5Me4)(C5Me3CH2)]

(CH3)2Si{C10(CH3)7(CH2)}

1 (CH3) 1.1 q, 1JC-H = 120

1 (CH3) 3.3 q, 1JC-H = 120

(CH3)2Si{C10(CH3)7(CH2)}

1 C 93.9 s

1 C 103.5 s

1 C 115.4 s

1 C 126.1 s

1 C 126.6 s

1 C (obscured by solvent) s

1 C 131.0 s

1 C 132.8 s

1 C 135.0 s

1 C 142.0 s

(CH3)2Si{C10(CH3)7(CH2)}

1 (CH3) 13.2 q, 1JC-H = 126

2 (CH3) 13.6 q, 1JC-H = 125

1 (CH3) 13.9 q, 1JC-H = 126

1 (CH3) 14.1 q, 1JC-H = 126

1 (CH3) 14.5 q, 1JC-H = 126

1 (CH3) 16.9 q, 1JC-H = 125

(CH3)2Si{C10(CH3)7(CH2)}

1 C 80.2 dd, 1JC-H = 149, 151

Ti-{CH2Si(CH3)3}

1 C 44.5 t, 1JC-H = 107

Ti-{CH2Si(CH3)3}

3 C 5.6 q, 1JC-H = 117

**Synthesis of [Me2Si(C5Me4)(C5Me3CH2)]TiMe**

A solution of {[Me2Si(C5Me4)2]TiMe2 (*ca*. 20 mg) in benzene (*ca*. 0.8 mL) was heated at 120˚C for 24 hours. The quantitative formation of dark purple [Me2Si(C5Me4)(C5Me3CH2)]TiMe was demostrated by 1H NMR spectroscopy. Analysis calculated for C21H32SiTi: C, 70.0 %; H, 8.9 %. Found: C, 69.1 %; H, 9.1 %. IR Data (KBr pellet, cm-1): 2959 (s), 2916 (s), 2867 (s), 2370 (w), 2344 (w), 1623 (w), 1444 (s), 1377 (s), 1332 (s), 1249 (s), 1136 (m), 1087 (m), 1025 (m), 834 (s), 773 (br s), 716 (s), 668 (s), 451 (w).

**NMR Data**

**Compound/Assignment  (ppm) Coupling (Hz)**

**1H NMR (C6D6)**

[Me2Si(C5Me4)(C5Me3CH2)]

(CH3)2Si{C10(CH3)7(CH2)}

1 (CH3) 0.33 s

1 (CH3) 0.12 s

(CH3)2Si{C10(CH3)7(CH2)}

1 (CH3) 2.15 s

1 (CH3) 2.10 s

1 (CH3) 2.05 s

1 (CH3) 1.91 s

1 (CH3) 1.88 s

1 (CH3) 1.69 s

1 (CH3) 1.63 s

(CH3)2Si{C10(CH3)7(CH2)}

1 H 1.42 d, 2JH-H = 4

1 H 2.47 d, 2JH-H = 4

Ti-(CH3) -1.08 s

**13C NMR (C6D6)**

[Me2Si(C5Me4)(C5Me3CH2)]

(CH3)2Si{C10(CH3)7(CH2)}

1 (CH3) 3.4 q, 1JC-H = 120

1 (CH3) 1.2 q, 1JC-H = 120

(CH3)2Si{C10(CH3)7(CH2)}

1 C 91.1 s

1 C 101.2 s

1 C 115.4 s

1 C 124.2 s

1 C 125.5 s

1 C 126.9 s

1 C 130.6 s

1 C 133.8 s

1 C 134.2 s

1 C 140.2 s

(CH3)2Si{C10(CH3)7(CH2)}

1 (CH3) 12.1 q, 1JC-H = 126

1 (CH3) 12.3 q, 1JC-H = 126

1 (CH3) 12.6 q, 1JC-H = 124

1 (CH3) 13.1 q, 1JC-H = 126

1 (CH3) 13.9 q, 1JC-H = 126

1 (CH3) 14.2 q, 1JC-H = 126

1 (CH3) 17.0 q, 1JC-H = 126

(CH3)2Si{C10(CH3)7(CH2)}

1 C 78.3 dd, 1JC-H = 149, 154

Ti-(CH3) 36.9 q, 1JC-H = 116

**Synthesis of [Me2Si(C5Me4)2]Ti(CO)2**

A mixture of [Me2Si(C5Me4)2]TiCl2 (1.51 g, 3.60 mmol), Mg (0.087 g, 3.58 mmol), and Hg (*ca*. 2 mL) was treated with THF (*ca*. 40 mL) at -78˚C. CO (*ca*. 1 atm.) was added and the mixture was allowed to warm to room temperature with stirring, giving a dark brown mixture over a period of 3 days. After this period, the volatile components were removed *in vacuo*, and the residue was extracted into toluene (*ca*. 200 mL) until the extracts were almost colorless. The volatile components were removed in vacuo and the residue was washed with cold pentane giving [Me2Si(C5Me4)2]Ti(CO)2 as a dark brown solid (0.94 g, 65.0 %).Analysis calculated for C22H30O2SiTi: C, 65.7 %; H, 7.5 %. Found: C, 65.6 %; H, 7.6 %. IR Data (KBr pellet, cm-1): 2910 (m), 1942 (vs) [(CO)], 1860 (vs), 1382 (s), 1343 (m), 1307 (m), 1252 (s), 1122 (m), 1014 (m), 837 (s), 811 (s), 764 (s), 678 (s), 552 (m), 481 (m), 455 (w), 444 (m). IR Data (pentane, cm-1): 1879 [(CO)].

**NMR Data**

**Compound/Assignment  (ppm) Coupling (Hz)**

**1H NMR (C6D6)**

[Me2Si(C5Me4)2]

(CH3)2Si{C5(CH3)4}2

2 (CH3) 0.43 s

(CH3)2Si{C5(CH3)4}2

8 (CH3) 1.74 s

**13C NMR (C6D6)**

[Me2Si(C5Me4)2]

(CH3)2Si{C5(CH3)4}2

2 (CH3) 3.3 q, 1JC-H = 120

(CH3)2Si{C5(CH3)4}2

2 C 69.7 s

4 C 105.2 s

4 C 116.5 s

(CH3)2Si{C5(CH3)4}2

4 (CH3) 11.9 q, 1JC-H = 127

4 (CH3) 13.2 q, 1JC-H = 126

Ti-(CO)2 258.3 s
